# Supplementary material for: Prevalence of high bloodpressure, hyperglycemia, dyslipidemia, metabolic syndrome and their determinants in Ethiopia: Evidences from the National NCDs STEPS Survey, 2015
Source: PubMed Central journal article supplement (PMC5942803; doi:10.1371/journal.pone.0194819), 2018-05-09
Supplement: pone.0194819.s003.pdf [file pone.0194819.s003.pdf]

Participant Identification Number

Step 1 Demographic Information

| CORE: Demographic Information                                                                    |                    |      |
|--------------------------------------------------------------------------------------------------|--------------------|------|
| Question                                                                                         | Response           | Code |
| Sex ( <i>Record Male / Female as observed</i> )                                                  | Male 1<br>Female 2 | C1   |
| How old are you?                                                                                 | Years              | C3   |
| In total, how many years have you spent at school and in full-time study (excluding pre-school)? | Years              | C4   |

| EXPANDED: Demographic Information                                                           |                                                                                                                                                                                                                                                                      |    |
|---------------------------------------------------------------------------------------------|----------------------------------------------------------------------------------------------------------------------------------------------------------------------------------------------------------------------------------------------------------------------|----|
| What is the <b>highest level of education</b> you have completed?                           | No formal schooling 1<br>Less than primary school 2<br>Primary school completed 3<br>Secondary school completed 4<br>College/University completed 6<br>Post graduate degree 7<br>Refused 88                                                                          | C5 |
| What is your <b>ethnic background</b> ?                                                     | Oromo 1<br>Amhara 2<br>Tigray 3<br>Somali 4<br>Wolayita 5<br>Sidama 6<br>Guragie 7<br>Hadiya 8<br>Afar 9<br>Gamo 10<br>Others 11 Sp _____<br>Refused 88                                                                                                              | C6 |
| What is your <b>marital status</b> ?                                                        | Never married 1<br>Currently married 2<br>Separated 3<br>Divorced 4<br>Widowed 5<br>Cohabiting 6<br>Refused 88                                                                                                                                                       | C7 |
| Which of the following best describes your <b>main work status</b> over the past 12 months? | Government employee 1<br>Non-government Employee 2<br>Private employee 3<br>Private Skilled worker 4<br>Farmer 5<br>Trader 6<br>Student 7<br>Homemaker/housewife 8<br>Retired 9<br>Unemployed (able to work) 10<br>Unemployed (unable to work) 11<br>Others 12 _____ | C8 |

### Participant Identification Number

|                                                                                                                                                            | Refused 88                                                                                                                                                                                 |      |
|------------------------------------------------------------------------------------------------------------------------------------------------------------|--------------------------------------------------------------------------------------------------------------------------------------------------------------------------------------------|------|
| How many people older than 18 years, including yourself (if older than 18 years), live in your household?                                                  | Number of people                                                                                                                                                                           | C9   |
| Question                                                                                                                                                   | Response                                                                                                                                                                                   | Code |
| Taking <b>the past year</b> , can you tell me what the average earnings (Birr) of the household have been?<br><i>(RECORD ONLY ONE, NOT ALL 3)</i>          | Per week <span style="float: right;"><i>Go to T1</i></span>                                                                                                                                | C10a |
|                                                                                                                                                            | OR per month <span style="float: right;"><i>Go to T1</i></span>                                                                                                                            | C10b |
|                                                                                                                                                            | OR per year <span style="float: right;"><i>Go to T1</i></span>                                                                                                                             | C10c |
|                                                                                                                                                            | Refused 88                                                                                                                                                                                 | C10d |
| If you don't know the amount, can you give an <b>estimate</b> of the annual household income if I read some options to you? Is it<br><i>(READ OPTIONS)</i> | $\leq 12,000$ Birr 1<br>More than 12,000 $\leq 18,000$ Birr 2<br>More than 18,000 $\leq 23,300$ 3<br>More than 23,300 $\leq 30,000$ 4<br>More than 30,000 5<br>Don't Know 77<br>Refused 88 | C11  |

## Step 1 Behavioural Measurements

| CORE: Tobacco Use                                                                                                                                                                           |                                                                                                                                                                                                       |              |
|---------------------------------------------------------------------------------------------------------------------------------------------------------------------------------------------|-------------------------------------------------------------------------------------------------------------------------------------------------------------------------------------------------------|--------------|
| Now I am going to ask you some questions about tobacco use.                                                                                                                                 |                                                                                                                                                                                                       |              |
| Question                                                                                                                                                                                    | Response                                                                                                                                                                                              | Code         |
| Do you <b>currently</b> smoke any <b>tobacco</b> products, such as cigarettes, cigars or pipes, <i>gaya</i> ?<br>(USE SHOWCARD)                                                             | Yes 1<br>No 2 <i>If No, go to T8</i>                                                                                                                                                                  | T1           |
| Do you currently smoke tobacco products <b>daily</b> ?                                                                                                                                      | Yes 1<br>No 2                                                                                                                                                                                         | T2           |
| How old were you when you <b>first started</b> smoking?                                                                                                                                     | Age (years)<br>Don't know 77 <i>If Known, go to T5a/T5aw</i>                                                                                                                                          | T3           |
| Do you remember how long ago it was?<br>(RECORD ONLY 1, NOT ALL 3)<br>Don't know 77                                                                                                         | In Years<br><i>If Known, go to T5a/T5aw</i>                                                                                                                                                           | T4a          |
|                                                                                                                                                                                             | OR in Months<br><i>If Known, go to T5a/T5aw</i>                                                                                                                                                       | T4b          |
|                                                                                                                                                                                             | OR in Weeks                                                                                                                                                                                           | T4c          |
| On average, <b>how many</b> of the following products do you smoke <b>each day/week</b> ?<br>(IF LESS THAN DAILY, RECORD WEEKLY)<br>(RECORD FOR EACH TYPE, USE SHOWCARD)<br>Don't Know 7777 | DAILY WEEKLY                                                                                                                                                                                          |              |
|                                                                                                                                                                                             | Manufactured cigarettes                                                                                                                                                                               | T5a/T5aw     |
|                                                                                                                                                                                             | Hand-rolled cigarettes                                                                                                                                                                                | T5b/T5bw     |
|                                                                                                                                                                                             | Pipes full of tobacco                                                                                                                                                                                 | T5c/T5cw     |
|                                                                                                                                                                                             | Number of Shisha sessions                                                                                                                                                                             | T5e/T5ew     |
|                                                                                                                                                                                             | Gaya                                                                                                                                                                                                  | T5X/<br>T5Xw |
|                                                                                                                                                                                             | Other<br><i>If Other, go to T5other, else go to T6</i>                                                                                                                                                | T5f/T5fw     |
| Other (please specify): _____                                                                                                                                                               | T5other/<br>T5otherw                                                                                                                                                                                  |              |
| During the past 12 months, have you tried to <b>stop smoking</b> ?                                                                                                                          | Yes 1<br>No 2                                                                                                                                                                                         | T6           |
| During any visit to a doctor or other health worker in the past 12 months, were you advised to quit smoking tobacco?                                                                        | Yes 1 <i>If T2=Yes, go to T12; if T2=No, go to T9</i><br>No 2 <i>If T2=Yes, go to T12; if T2=No, go to T9</i><br>No visit during the past 12 months 3 <i>If T2=Yes, go to T12; if T2=No, go to T9</i> | T7           |
| In the past, did you <b>ever smoke</b> any tobacco products?<br>(USE SHOWCARD)                                                                                                              | Yes 1<br>No 2 <i>If No, go to T12</i>                                                                                                                                                                 | T8           |
| In the past, did you <b>ever smoke daily</b> ?                                                                                                                                              | Yes 1 <i>If T1=Yes, go to T12, else go to T10</i><br>No 2 <i>If T1=Yes, go to T12, else go to T10</i>                                                                                                 | T9           |
| How old were you when you <b>stopped</b> smoking?                                                                                                                                           | Age (years)<br>Don't Know 77 <i>If Known, go to T12</i>                                                                                                                                               | T10          |
| How <b>long ago</b> did you stop smoking?<br>(RECORD ONLY 1, NOT ALL 3)<br>Don't Know 77                                                                                                    | Years ago<br><i>If Known, go to T12</i>                                                                                                                                                               | T11a         |
|                                                                                                                                                                                             | OR Months ago<br><i>If Known, go to T12</i>                                                                                                                                                           | T11b         |
|                                                                                                                                                                                             | OR Weeks ago                                                                                                                                                                                          | T11c         |

**Participant Identification Number**

| <b>CORE: Tobacco Use, cont.</b>                                                                                                                                                        |                                                                                |                |
|----------------------------------------------------------------------------------------------------------------------------------------------------------------------------------------|--------------------------------------------------------------------------------|----------------|
| <b>Question</b>                                                                                                                                                                        | <b>Response</b>                                                                | <b>Code</b>    |
| Do you <b>currently use</b> any <b>smokeless tobacco</b> products such as <i>snuff(Suret), chewing tobacco, (USE SHOWCARD)</i>                                                         | Yes 1<br>No 2 <i>If No, go to T15</i>                                          | T12            |
| Do you <b>currently use smokeless tobacco</b> products <b>daily</b> ?                                                                                                                  | Yes 1<br>No 2 <i>If No, go to T14aw</i>                                        | T13            |
| On average, how many <b>times a day/week</b> do you use ...<br><i>(IF LESS THAN DAILY, RECORD WEEKLY)</i><br><i>(RECORD FOR EACH TYPE, USE SHOWCARD)</i><br><br><i>Don't Know 7777</i> | DAILY                      WEEKLY                                              |                |
|                                                                                                                                                                                        | Snuff, by mouth                                                                | T14a/<br>T14aw |
|                                                                                                                                                                                        | Snuff, by nose                                                                 | T14b/<br>T14bw |
|                                                                                                                                                                                        | Chewing tobacco                                                                | T14c/<br>T14cw |
|                                                                                                                                                                                        | Other<br><i>If Other, go to T14other, if T13=No, go to T16, else go to T17</i> | T14e/<br>T14ew |
| Other (please specify): _____ /<br><i>f T13=No, go to T16, else go to T17</i>                                                                                                          | T14other/<br>T14otherw                                                         |                |
| In the <b>past</b> , did you <b>ever use</b> smokeless tobacco products such as <i>snuff, chewing tobacco</i> ?                                                                        | Yes 1<br>No 2 <i>If No, go to T17</i>                                          | T15            |
| In the <b>past</b> , did you <b>ever use</b> smokeless tobacco products such as <i>snuff, chewing tobacco daily</i> ?                                                                  | Yes 1<br>No 2                                                                  | T16            |
| During the past 30 days, did someone smoke <b>in your home</b> ?                                                                                                                       | Yes 1<br>No 2                                                                  | T17            |
| During the past 30 days, did someone smoke in closed areas <b>in your workplace</b> (in the building, in a work area or a specific office)?                                            | Yes 1<br>No 2<br>Don't work in a closed area 3                                 | T18            |

## Participant Identification Number

| Tobacco Policy                                                                                                                                                                                                                                                |                                                                                                                                                                                          |      |
|---------------------------------------------------------------------------------------------------------------------------------------------------------------------------------------------------------------------------------------------------------------|------------------------------------------------------------------------------------------------------------------------------------------------------------------------------------------|------|
| You have been asked questions on tobacco consumption before. The next questions ask about tobacco control policies. They include questions on your exposure to the media and advertisement, on cigarette promotions, health warnings and cigarette purchases. |                                                                                                                                                                                          |      |
| Question                                                                                                                                                                                                                                                      | Response                                                                                                                                                                                 | Code |
| During the past 30 days, have you noticed information about the dangers of smoking cigarettes or that encourages quitting through the following media?<br>(RECORD FOR EACH)                                                                                   |                                                                                                                                                                                          |      |
| Newspapers or magazines                                                                                                                                                                                                                                       | Yes 1<br>No 2<br>Don't know 77                                                                                                                                                           | TP1a |
| Television                                                                                                                                                                                                                                                    | Yes 1<br>No 2<br>Don't know 77                                                                                                                                                           | TP1b |
| Radio                                                                                                                                                                                                                                                         | Yes 1<br>No 2<br>Don't know 77                                                                                                                                                           | TP1c |
| During the past 30 days, have you noticed any <b>advertisements</b> or <b>signs</b> promoting cigarettes in stores where cigarettes are sold?                                                                                                                 | Yes 1<br>No 2<br>Don't know 77                                                                                                                                                           | TP2  |
| During the past 30 days, have you noticed any of the following types of cigarette promotions?<br>(RECORD FOR EACH)                                                                                                                                            |                                                                                                                                                                                          |      |
| Free samples of cigarettes                                                                                                                                                                                                                                    | Yes 1<br>No 2<br>Don't know 77                                                                                                                                                           | TP3a |
| Cigarettes at sale prices                                                                                                                                                                                                                                     | Yes 1<br>No 2<br>Don't know 77                                                                                                                                                           | TP3b |
| Coupons for cigarettes                                                                                                                                                                                                                                        | Yes 1<br>No 2<br>Don't know 77                                                                                                                                                           | TP3c |
| Free gifts or special discount offers on other products when buying cigarettes                                                                                                                                                                                | Yes 1<br>No 2<br>Don't know 77                                                                                                                                                           | TP3d |
| Clothing or other items with a cigarette brand name or logo                                                                                                                                                                                                   | Yes 1<br>No 2<br>Don't know 77                                                                                                                                                           | TP3e |
| Cigarette promotions in the mail                                                                                                                                                                                                                              | Yes 1<br>No 2<br>Don't know 77                                                                                                                                                           | TP3f |
| <i>The next questions TP4 – TP7 are administered to current smokers only.</i>                                                                                                                                                                                 |                                                                                                                                                                                          |      |
| During the past 30 days, did you notice any <b>health warnings on cigarette packages</b> ?                                                                                                                                                                    | Yes 1<br>No 2 <i>If no, go to TP6</i><br>Did not see any cigarette packages 3 <i>If "did not see any cigarette packages", go to TP6</i><br>Don't know 77 <i>If Don't know, go to TP6</i> | TP4  |
| During the past 30 days, have warning labels on cigarette packages led you to <b>think about quitting</b> ?                                                                                                                                                   | Yes 1<br>No 2<br>Don't know 77                                                                                                                                                           | TP5  |
| The last time you bought manufactured cigarettes for yourself, <b>how many cigarettes</b> did you buy in total?                                                                                                                                               | Number of cigarettes<br>Don't know or Don't smoke or purchase manuf. cigarettes 7777<br><i>If "Don't know or don't smoke or purchase manuf. cig.", end section</i>                       | TP6  |
| In total, <b>how much money</b> did you pay for this purchase?                                                                                                                                                                                                | Amount<br>Don't know 7777<br>Refused 8888<br>Birr Cents                                                                                                                                  | TP7  |

**Participant Identification Number**

| <b>CORE: Alcohol Consumption</b>                                                                                                                              |                                                                                                                                  |             |
|---------------------------------------------------------------------------------------------------------------------------------------------------------------|----------------------------------------------------------------------------------------------------------------------------------|-------------|
| The next questions ask about the consumption of alcohol.                                                                                                      |                                                                                                                                  |             |
| <b>Question</b>                                                                                                                                               | <b>Response</b>                                                                                                                  | <b>Code</b> |
| Have you <b>ever</b> consumed any alcohol such beer, Tella, Bordie, Tej, Arake, wine, spirits, beherawi, ye bale zaf?<br>(USE SHOWCARD OR SHOW EXAMPLES)      | Yes 1<br>No 2 <i>If No, go to A16</i>                                                                                            | A1          |
| Have you consumed any alcohol within the <b>past 12 months</b> ?                                                                                              | Yes 1 <i>If Yes, go to A4</i><br>No 2                                                                                            | A2          |
| Have you stopped drinking due to health reasons, such as a negative impact on your health or on the advice of your doctor or other health worker?             | Yes 1 <i>If Yes, go to A16</i><br>No 2 <i>If No, go to A16</i>                                                                   | A3          |
| During the past 12 months, <b>how frequently</b> have you had at least one standard alcoholic drink?<br><br>(READ RESPONSES, USE SHOWCARD)                    | Daily 1<br>5-6 days per week 2<br>3-4 days per week 3<br>1-2 days per week 4<br>1-3 days per month 5<br>Less than once a month 6 | A4          |
| Have you consumed any alcohol within the <b>past 30 days</b> ?                                                                                                | Yes 1<br>No 2 <i>If No, go to A13</i>                                                                                            | A5          |
| During the past 30 days, on how many <b>occasions</b> did you have at least one standard alcoholic drink?                                                     | Number<br>Don't know 77                                                                                                          | A6          |
| During the past 30 days, when you drank alcohol, how many <b>standard drinks on average</b> did you have during one drinking occasion?<br>(USE SHOWCARD)      | Number<br>Don't know 77                                                                                                          | A7          |
| During the past 30 days, what was the <b>largest number</b> of standard drinks you had on a single occasion, counting all types of alcoholic drinks together? | Largest number<br>Don't Know 77                                                                                                  | A8          |
| During the past 30 days, how many times did you have <b>six or more</b> standard drinks in a single drinking occasion?                                        | Number of times<br>Don't Know 77                                                                                                 | A9          |
| During the past 30 days, when you consumed an alcoholic drink, how often was it with meals? Please do not count snacks.                                       | Usually with meals 1<br>Sometimes with meals 2<br>Rarely with meals 3<br>Never with meals 4                                      | X6          |
| During each of the <b>past 7 days</b> , how many standard drinks did you have each day?<br><br>(USE SHOWCARD)<br><br><i>Don't Know 77</i>                     | Monday                                                                                                                           | A10a        |
|                                                                                                                                                               | Tuesday                                                                                                                          | A10b        |
|                                                                                                                                                               | Wednesday                                                                                                                        | A10c        |
|                                                                                                                                                               | Thursday                                                                                                                         | A10d        |
|                                                                                                                                                               | Friday                                                                                                                           | A10e        |
|                                                                                                                                                               | Saturday                                                                                                                         | A10f        |
|                                                                                                                                                               | Sunday                                                                                                                           | A10g        |

## Participant Identification Number

| <b>CORE: Alcohol Consumption, cont.</b>                                                                                                                                                                                                                                                                                                                                                                               |                                                                                                                                                 |      |
|-----------------------------------------------------------------------------------------------------------------------------------------------------------------------------------------------------------------------------------------------------------------------------------------------------------------------------------------------------------------------------------------------------------------------|-------------------------------------------------------------------------------------------------------------------------------------------------|------|
| <p>I have just asked you about your consumption of alcohol during the past 7 days. The questions were about alcohol in general, while the next questions refer to your consumption of homebrewed alcohol, alcohol brought over the border/from another country, any alcohol not intended for drinking or other untaxed alcohol. Please only think about these types of alcohol when answering the next questions.</p> |                                                                                                                                                 |      |
| Question                                                                                                                                                                                                                                                                                                                                                                                                              | Response                                                                                                                                        | Code |
| <p>During the <b>past 7 days</b>, did you consume any <b>homebrewed</b> alcohol, like Tella, Tej, Katikalla, Bordie?</p> <p><i>(USE SHOWCARD)</i></p>                                                                                                                                                                                                                                                                 | <p>Yes 1</p> <p>No 2 <i>If No, go to A13</i></p>                                                                                                | A11  |
| <p>On average, <b>how many standard drinks</b> of the following did you consume <b>during the past 7 days</b>?</p> <p><i>(USE SHOWCARD)</i></p> <p><i>Don't Know ??</i></p>                                                                                                                                                                                                                                           | Homebrewed spirits, e.g. Katikala                                                                                                               | A12a |
|                                                                                                                                                                                                                                                                                                                                                                                                                       | Homebrewed beer or wine, e.g. Tella, Tej                                                                                                        | A12b |
|                                                                                                                                                                                                                                                                                                                                                                                                                       | Alcohol brought over the border/from another country                                                                                            | A12c |
|                                                                                                                                                                                                                                                                                                                                                                                                                       | Alcohol not intended for drinking, e.g. alcohol-based medicines, perfumes, after shaves                                                         | A12d |
|                                                                                                                                                                                                                                                                                                                                                                                                                       | Other untaxed alcohol in the country                                                                                                            | A12e |
| <p>During the <b>past 12 months</b>, how often have you found that you were not able to stop drinking once you had started?</p>                                                                                                                                                                                                                                                                                       | <p>Daily or almost daily 1</p> <p>Weekly 2</p> <p>Monthly 3</p> <p>Less than monthly 4</p> <p>Never 5</p>                                       | A13  |
| <p>During the <b>past 12 months</b>, how often have you failed to do what was normally expected from you because of drinking?</p>                                                                                                                                                                                                                                                                                     | <p>Daily or almost daily 1</p> <p>Weekly 2</p> <p>Monthly 3</p> <p>Less than monthly 4</p> <p>Never 5</p>                                       | A14  |
| <p>During the <b>past 12 months</b>, how often have you needed a first drink in the morning to get yourself going after a heavy drinking session?</p>                                                                                                                                                                                                                                                                 | <p>Daily or almost daily 1</p> <p>Weekly 2</p> <p>Monthly 3</p> <p>Less than monthly 4</p> <p>Never 5</p>                                       | A15  |
| <p>During the <b>past 12 months</b>, have you had family problems or problems with your partner due to <b>someone else's</b> drinking?</p>                                                                                                                                                                                                                                                                            | <p>Yes, more than monthly 1</p> <p>Yes, monthly 2</p> <p>Yes, several times but less than monthly 3</p> <p>Yes, once or twice 4</p> <p>No 5</p> | A16  |



## Participant Identification Number

| <b>Diet</b>                                                                                                                                                                                                                                                                                                                                                                                                                                                                                                                                                                                                                                  |                                                                                                              |      |
|----------------------------------------------------------------------------------------------------------------------------------------------------------------------------------------------------------------------------------------------------------------------------------------------------------------------------------------------------------------------------------------------------------------------------------------------------------------------------------------------------------------------------------------------------------------------------------------------------------------------------------------------|--------------------------------------------------------------------------------------------------------------|------|
| <p>The next questions ask about the fruits and vegetables that you usually eat. I have a nutrition card here that shows you some examples of local fruits and vegetables. Each picture represents the size of a serving. As you answer these questions please think of a typical week in the last year.</p>                                                                                                                                                                                                                                                                                                                                  |                                                                                                              |      |
| Question                                                                                                                                                                                                                                                                                                                                                                                                                                                                                                                                                                                                                                     | Response                                                                                                     | Code |
| In a typical week, on how many days do you <b>eat fruit</b> ?<br><i>(USE SHOWCARD)</i>                                                                                                                                                                                                                                                                                                                                                                                                                                                                                                                                                       | Number of days<br>Don't Know 77 <span style="float: right;"><i>If Zero days, go to D3</i></span>             | D1   |
| How many <b>servings</b> of fruit do you eat on <b>one</b> of those days? <i>(USE SHOWCARD)</i>                                                                                                                                                                                                                                                                                                                                                                                                                                                                                                                                              | Number of servings<br>Don't Know 77                                                                          | D2   |
| In a typical week, on how many days do you <b>eat vegetables</b> ? <i>(USE SHOWCARD)</i>                                                                                                                                                                                                                                                                                                                                                                                                                                                                                                                                                     | Number of days<br>Don't Know 77 <span style="float: right;"><i>If Zero days, go to D5</i></span>             | D3   |
| How many <b>servings</b> of vegetables do you eat on one of those days? <i>(USE SHOWCARD)</i>                                                                                                                                                                                                                                                                                                                                                                                                                                                                                                                                                | Number of servings<br>Don't know 77                                                                          | D4   |
| <b>Dietary salt</b>                                                                                                                                                                                                                                                                                                                                                                                                                                                                                                                                                                                                                          |                                                                                                              |      |
| <p>With the next questions, we would like to learn more about salt in your diet. Dietary salt includes ordinary table salt, unrefined salt such as sea salt, iodized salt, salty stock cubes and powders, and salty sauces such as soya sauce or fish sauce (see showcard). The following questions are on adding salt to the food right before you eat it, on how food is prepared in your home, on eating processed foods that are high in salt such as <i>[insert country specific examples]</i>, and questions on controlling your salt intake. Please answer the questions even if you consider yourself to eat a diet low in salt.</p> |                                                                                                              |      |
| How often do you <b>add salt or a salty sauce such as soya sauce</b> to your food right before you eat it or as you are eating it?<br><br><i>(SELECT ONLY ONE)</i><br><br><i>(USE SHOWCARD)</i>                                                                                                                                                                                                                                                                                                                                                                                                                                              | Always 1<br>Often 2<br>Sometimes 3<br>Rarely 4<br>Never 5<br>Don't know 77                                   | D5   |
| How often is <b>salt, salty seasoning or a salty sauce added</b> in cooking or preparing foods in your household?                                                                                                                                                                                                                                                                                                                                                                                                                                                                                                                            | Always 1<br>Often 2<br>Sometimes 3<br>Rarely 4<br>Never 5<br>Don't know 77                                   | D6   |
| How often do you eat <b>processed food high in salt</b> ? By processed food high in salt, I mean foods that have been altered from their natural state, such as packaged salty snacks, canned salty food including pickles and preserves, salty food prepared at a fast food restaurant, cheese, bacon, Mitmitta, and processed meat like Quantta<br><i>(USE SHOWCARD)</i>                                                                                                                                                                                                                                                                   | Always 1<br>Often 2<br>Sometimes 3<br>Rarely 4<br>Never 5<br>Don't know 77                                   | D7   |
| <b>How much salt or salty sauce</b> do you think you consume?                                                                                                                                                                                                                                                                                                                                                                                                                                                                                                                                                                                | Far too much 1<br>Too much 2<br>Just the right amount 3<br>Too little 4<br>Far too little 5<br>Don't know 77 | D8   |

**Diet**

**Participant Identification Number**

| <b>Question</b>                                                                                                                                          | <b>Response</b>                                                                                                                                                                          | <b>Code</b> |
|----------------------------------------------------------------------------------------------------------------------------------------------------------|------------------------------------------------------------------------------------------------------------------------------------------------------------------------------------------|-------------|
| How important to you is <b>lowering the salt</b> in your diet?                                                                                           | Very important 1<br>Somewhat important 2<br>Not at all important 3<br>Don't know 77                                                                                                      | D9          |
| Do you think that too much salt or salty sauce in your diet could cause a <b>health problem</b> ?                                                        | Yes 1<br>No 2<br>Don't know 77                                                                                                                                                           | D10         |
| Do you do any of the following on a regular basis to <b>control your salt intake</b> ?<br>(RECORD FOR EACH)                                              |                                                                                                                                                                                          |             |
| Limit consumption of processed foods                                                                                                                     | Yes 1<br>No 2                                                                                                                                                                            | D11a        |
| Look at the salt or sodium content on food labels                                                                                                        | Yes 1<br>No 2                                                                                                                                                                            | D11b        |
| Buy low salt/sodium alternatives                                                                                                                         | Yes 1<br>No 2                                                                                                                                                                            | D11c        |
| Use spices other than salt when cooking                                                                                                                  | Yes 1<br>No 2                                                                                                                                                                            | D11d        |
| Avoid eating foods prepared outside of a home                                                                                                            | Yes 1<br>No 2                                                                                                                                                                            | D11e        |
| Do other things specifically to control your salt intake                                                                                                 | Yes 1 <i>If Yes, go to D11other</i><br>No 2                                                                                                                                              | D11f        |
| Other (please specify)                                                                                                                                   |                                                                                                                                                                                          | D11other    |
| The next questions ask about the oil or fat that is most often used for meal preparation in your household, and about meals that you eat outside a home. |                                                                                                                                                                                          |             |
| What type of <b>oil or fat is most often</b> used for meal preparation in your household?<br><br>(USE SHOWCARD)<br>(SELECT ONLY ONE)                     | Vegetable oil 1<br>Homemade oil product 2<br>Butter 3<br>Margarine 4<br>Solid fats 8<br>Other 5 <i>If Other, go to D12 other</i><br>None in particular 6<br>None used 7<br>Don't know 77 | D12         |
|                                                                                                                                                          | Other specify _____                                                                                                                                                                      | D12other    |
| On average, how many meals per week do you eat that were not prepared at a home? By meal, I mean breakfast, lunch and dinner.                            | Number<br>Don't know 77                                                                                                                                                                  | D13         |



## Participant Identification Number

| <b>Physical Activity, Continued</b>                                                                                                                                                                                                                               |                                                                    |                      |
|-------------------------------------------------------------------------------------------------------------------------------------------------------------------------------------------------------------------------------------------------------------------|--------------------------------------------------------------------|----------------------|
| Question                                                                                                                                                                                                                                                          | Response                                                           | Code                 |
| <p>Do you do any moderate-intensity sports, fitness or recreational (leisure) activities that cause a small increase in breathing or heart rate such as brisk walking, cycling, swimming, volleyball for at least 10 minutes continuously?<br/>(USE SHOWCARD)</p> | <p>Yes 1</p> <p>No 2 <i>If No, go to P16</i></p>                   | <p>P13</p>           |
| <p>In a typical week, on how many days do you do moderate-intensity sports, fitness or recreational (leisure) activities?</p>                                                                                                                                     | <p>Number of days</p>                                              | <p>P14</p>           |
| <p>How much time do you spend doing moderate-intensity sports, fitness or recreational (leisure) activities on a typical day?</p>                                                                                                                                 | <p>Hours : minutes :<br/>                  hrs            mins</p> | <p>P15<br/>(a-b)</p> |

| <b>Physical Activity</b>                                                                                                                                                                                                                                                                                                              |                                                                    |                      |
|---------------------------------------------------------------------------------------------------------------------------------------------------------------------------------------------------------------------------------------------------------------------------------------------------------------------------------------|--------------------------------------------------------------------|----------------------|
| <b>Sedentary behavior</b>                                                                                                                                                                                                                                                                                                             |                                                                    |                      |
| <p>The following question is about sitting or reclining at work, at home, getting to and from places, or with friends including time spent sitting at a desk, sitting with friends, traveling in car, bus, train, reading, playing games/cards or watching television, but do not include time spent sleeping.<br/>(USE SHOWCARD)</p> |                                                                    |                      |
| <p>How much time do you usually spend sitting or reclining on a typical day?</p>                                                                                                                                                                                                                                                      | <p>Hours : minutes :<br/>                  hrs            mins</p> | <p>P16<br/>(a-b)</p> |

**Participant Identification Number**

| <b>History of Raised Blood Pressure</b>                                                                                               |                                       |             |
|---------------------------------------------------------------------------------------------------------------------------------------|---------------------------------------|-------------|
| <b>Question</b>                                                                                                                       | <b>Response</b>                       | <b>Code</b> |
| Have you ever had your blood pressure measured by a doctor or other health worker?                                                    | Yes 1<br>No 2 <i>If No, go to X10</i> | H1          |
| Have you ever been told by a doctor or other health worker that you have raised blood pressure or hypertension?                       | Yes 1<br>No 2 <i>If No, go to X10</i> | H2a         |
| Have you been told in the past 12 months?                                                                                             | Yes 1<br>No 2                         | H2b         |
| In the past two weeks, have you taken any drugs (medication) for raised blood pressure prescribed by a doctor or other health worker? | Yes 1<br>No 2                         | H3          |
| Have you ever seen a traditional healer for raised blood pressure or hypertension?                                                    | Yes 1<br>No 2                         | H4          |
| Are you currently taking any herbal or traditional remedy for your raised blood pressure?                                             | Yes 1<br>No 2                         | H5          |
| Has any of your family members (biological parents, siblings or children) ever had raised blood pressure or hypertension?             | Yes 1<br>No 2                         | X10         |

| <b>History of Diabetes</b>                                                                                               |                                       |     |
|--------------------------------------------------------------------------------------------------------------------------|---------------------------------------|-----|
| Have you ever had your blood sugar measured by a doctor or other health worker?                                          | Yes 1<br>No 2 <i>If No, go to X11</i> | H6  |
| Have you ever been told by a doctor or other health worker that you have raised blood sugar or diabetes?                 | Yes 1<br>No 2 <i>If No, go to X11</i> | H7a |
| Have you been told in the past 12 months?                                                                                | Yes 1<br>No 2                         | H7b |
| In the past two weeks, have you taken any drugs (medication) for diabetes prescribed by a doctor or other health worker? | Yes 1<br>No 2                         | H8  |
| Are you currently taking insulin for diabetes prescribed by a doctor or other health worker?                             | Yes 1<br>No 2                         | H9  |
| Have you ever seen a traditional healer for diabetes or raised blood sugar?                                              | Yes 1<br>No 2                         | H10 |
| Are you currently taking any herbal or traditional remedy for your diabetes?                                             | Yes 1<br>No 2                         | H11 |
| Has any of your family members (biological parents, siblings or children) ever had raised blood sugar or Diabetes?       | Yes 1<br>No 2                         | X11 |

**Participant Identification Number**

| <b>History of Raised Total Cholesterol</b>                                                                                                        |                                       |             |
|---------------------------------------------------------------------------------------------------------------------------------------------------|---------------------------------------|-------------|
| <b>Question</b>                                                                                                                                   | <b>Response</b>                       | <b>Code</b> |
| Have you ever had your cholesterol (fat levels in your blood) measured by a doctor or other health worker?                                        | Yes 1<br>No 2 <i>If No, go to X12</i> | H12         |
| Have you ever been told by a doctor or other health worker that you have raised cholesterol?                                                      | Yes 1<br>No 2 <i>If No, go to X12</i> | H13a        |
| Have you been told in the past 12 months?                                                                                                         | Yes 1<br>No 2                         | H13b        |
| In the past two weeks, have you taken any oral treatment (medication) for raised total cholesterol prescribed by a doctor or other health worker? | Yes 1<br>No 2                         | H14         |
| Have you ever seen a traditional healer for raised cholesterol?                                                                                   | Yes 1<br>No 2                         | H15         |
| Are you currently taking any herbal or traditional remedy for your raised cholesterol?                                                            | Yes 1<br>No 2                         | H16         |
| Has any of your family members (biological parents, siblings or children) ever had raised Cholesterol?                                            | Yes 1                                 | X12         |
|                                                                                                                                                   | No 2                                  |             |

| <b>History of Cardiovascular Diseases</b>                                                                                               |               |     |
|-----------------------------------------------------------------------------------------------------------------------------------------|---------------|-----|
| Have you ever had a heart attack or chest pain from heart disease (angina) or a stroke (cerebrovascular accident or incident)?          | Yes 1<br>No 2 | H17 |
| Are you currently taking aspirin regularly to prevent or treat heart disease?                                                           | Yes 1         | H18 |
| Are you currently taking statins (Lovastatin/Simvastatin/Atorvastatin or any other statin) regularly to prevent or treat heart disease? | Yes 1<br>No 2 | H19 |

| <b>Lifestyle Advice</b>                                                                                                              |                                                               |      |
|--------------------------------------------------------------------------------------------------------------------------------------|---------------------------------------------------------------|------|
| During the past three years, has a doctor or other health worker advised you to do any of the following?<br><i>(RECORD FOR EACH)</i> |                                                               |      |
| Quit using tobacco or don't start                                                                                                    | Yes 1<br>No 2                                                 | H20a |
| Reduce salt in your diet                                                                                                             | Yes 1<br>No 2                                                 | H20b |
| Eat at least five servings of fruit and/or vegetables each day                                                                       | Yes 1<br>No 2                                                 | H20c |
| Reduce fat in your diet                                                                                                              | Yes 1<br>No 2                                                 | H20d |
| Start or do more physical activity                                                                                                   | Yes 1<br>No 2                                                 | H20e |
| Maintain a healthy body weight or lose weight                                                                                        | Yes 1 <i>If C1=1 go to K1</i><br>No 2 <i>If C1=1 go to K1</i> | H20f |

## Participant Identification Number

| (for women only): Cervical Cancer Screening                                                                                                                                                                                                                                                                                                                                                                                                                                                                                                                                                                                                                                                                                                      |                                |      |
|--------------------------------------------------------------------------------------------------------------------------------------------------------------------------------------------------------------------------------------------------------------------------------------------------------------------------------------------------------------------------------------------------------------------------------------------------------------------------------------------------------------------------------------------------------------------------------------------------------------------------------------------------------------------------------------------------------------------------------------------------|--------------------------------|------|
| <p>The next question asks about cervical cancer prevention. Screening tests for cervical cancer prevention can be done in different ways, including Visual Inspection with Acetic Acid/vinegar (VIA), pap smear and Human Papillomavirus (HPV) test. VIA is an inspection of the surface of the uterine cervix after acetic acid (or vinegar) has been applied to it. For both pap smear and HPV test, a doctor or nurse uses a swab to wipe from inside your vagina, take a sample and send it to a laboratory. It is even possible that you were given the swab yourself and asked to swab the inside of your vagina. The laboratory checks for abnormal cell changes if a pap smear is done, and for the HP virus if an HPV test is done.</p> |                                |      |
| Question                                                                                                                                                                                                                                                                                                                                                                                                                                                                                                                                                                                                                                                                                                                                         | Response                       | Code |
| Have you ever had a screening test for cervical cancer, using any of these methods described above?                                                                                                                                                                                                                                                                                                                                                                                                                                                                                                                                                                                                                                              | Yes 1<br>No 2<br>Don't know 77 | CX1  |

| Khat use                                                                                                                                                     |                                                                                                                                  |      |
|--------------------------------------------------------------------------------------------------------------------------------------------------------------|----------------------------------------------------------------------------------------------------------------------------------|------|
| Now I am going to ask you some questions about Khat chewing.                                                                                                 |                                                                                                                                  |      |
| Question                                                                                                                                                     | Response                                                                                                                         | Code |
| Have you ever chewed Khat?<br>(USE SHOWCARD)                                                                                                                 | Yes 1<br>No 2 <i>If No, go to K14</i>                                                                                            | K1   |
| Do you currently chew Khat?                                                                                                                                  | Yes 1<br>No 2 <i>If No, go to K8</i>                                                                                             | K2   |
| During the past 12 months, how frequently did you chew Khat?                                                                                                 | Daily 1<br>5-6 days per week 2<br>3-4 days per week 3<br>1-2 days per week 4<br>1-3 days per month 5<br>Less than once a month 6 | K3   |
| How old were you when you <b>first started</b> chewing Khat?                                                                                                 | Age (years)<br>Don't know 77 <i>If Known, go to K5</i>                                                                           | K4   |
| Do you remember how long ago it was?<br>(RECORD ONLY 1, NOT ALL 3)<br><br>Don't know 77                                                                      | In Years <i>If Known, go to K5</i>                                                                                               | K4a  |
|                                                                                                                                                              | OR in Months <i>If Known, go to K5</i>                                                                                           | K4b  |
|                                                                                                                                                              | OR in Weeks                                                                                                                      | K4c  |
| On average, <b>how many</b> bundles of Khat do you chew <b>each day/week</b> ?<br><br>(IF LESS THAN DAILY, RECORD WEEKLY)<br>(USE SHOWCARD)<br>Don't Know 77 | DAILY      WEEKLY<br><br>Bundles of Khat                                                                                         | K5   |
| During the past 12 months, have you tried to <b>stop chewing Khat</b> ?                                                                                      | Yes 1<br>No 2                                                                                                                    | K6   |
| During any visit to a doctor or other health worker in the past 12 months, were you advised to <b>quit chewing Khat</b> ?                                    | Yes 1 <i>go to K9</i><br>No 2 <i>go to K9</i><br>No visit during the past 12 months 3 <i>go to K9</i>                            | K7   |
| How old were you when you <b>stopped</b> chewing Khat?                                                                                                       | Age (years) <i>If Known, go to K10</i>                                                                                           | K8   |
| How long ago did you stop chewing Khat?<br>(RECORD ONLY 1, NOT ALL 3)<br><br>Don't Know 77                                                                   | Years ago <b>If Known, go to K10</b>                                                                                             | K8a  |
|                                                                                                                                                              | OR Months ago <b>If Known, go to K10</b>                                                                                         | K8b  |
|                                                                                                                                                              | OR Weeks ago <b>if known, go to K10</b>                                                                                          | K8c  |

### Participant Identification Number

|                                                                                                                                           |                                                   |     |
|-------------------------------------------------------------------------------------------------------------------------------------------|---------------------------------------------------|-----|
| Do you currently smoke tobacco products while chewing Khat?<br>(USE TOBACCO SHOWCARD)                                                     | Yes 1 If yes, go to K11<br>No 2                   | K9  |
| In the <b>past</b> , did you <b>ever smoke</b> tobacco products while chewing Khat?                                                       | Yes 1 If K2=2 go to K13<br>No 2 If K2=2 go to K13 | K10 |
| Does one or more of your friends smoke tobacco products while you chew Khat together?                                                     | Yes 1<br>No 2                                     | K11 |
| Do you currently drink alcohol after you chew Khat?                                                                                       | Yes 1 If yes, go to K14<br>No 2                   | K12 |
| In the <b>past</b> , did you <b>ever drink alcohol</b> while chewing Khat?                                                                | Yes 1<br>No 2                                     | K13 |
| During the past 12 months, have you had family problems or problems with your partner due to consumption of Khat by you or somebody else? | Yes 1<br>No 2                                     | K14 |

## Violence and Injury

### CORE: Injury

The next questions ask about different experiences and behaviours that are related to road traffic injuries.

| Question                                                                                                                | Response                                                                                                                                                                                                            | Code    |
|-------------------------------------------------------------------------------------------------------------------------|---------------------------------------------------------------------------------------------------------------------------------------------------------------------------------------------------------------------|---------|
| In the past 12 months, have you been involved in a road traffic crash as a driver, passenger, pedestrian, or cyclist?   | Yes (as driver) 1<br>Yes (as passenger) 2<br>Yes (as pedestrian) 3<br>Yes (as a cyclist) 4<br>No 5 <i>If No, go to V5</i><br>Don't know 77 <i>If don't know, go to V5</i><br>Refused 88 <i>If Refused, go to V5</i> | V3      |
| Did you have any injuries in this road traffic crash which required medical attention?                                  | Yes 1<br>No 2<br>Don't know 77<br>Refused 88                                                                                                                                                                        | V4      |
| The next questions ask about the most serious accidental injury you have had in the past 12 months.                     |                                                                                                                                                                                                                     |         |
| In the past 12 months, were you injured accidentally, other than road traffic crashes which required medical attention? | Yes 1<br>No 2 <i>If No, go to V11</i><br>Don't know 77 <i>If don't know, go to V11</i><br>Refused 88 <i>If Refused, go to V11</i>                                                                                   | V5      |
| Please indicate which of the following the cause of this injury was.                                                    | Fall 1<br>Burn 2<br>Poisoning 3<br>Cut 4<br>Near-drowning 5<br>Animal bite 6<br>Other (specify) 7<br>Don't know 77<br>Refused 88                                                                                    | V6      |
|                                                                                                                         | Other (please specify) _____                                                                                                                                                                                        | V6other |



## Participant Identification Number

| CORE: Violence                                                                                                                        |                                                                                                                                                                                                                |          |
|---------------------------------------------------------------------------------------------------------------------------------------|----------------------------------------------------------------------------------------------------------------------------------------------------------------------------------------------------------------|----------|
| The following questions are about different experiences and behaviours that are related to violence.                                  |                                                                                                                                                                                                                |          |
| Question                                                                                                                              | Response                                                                                                                                                                                                       | Code     |
| In the past 12 months, how many times were you in a violent incident in which you were injured and required medical attention?        | Never 1 <i>If never, go to V16</i><br>Rarely (1-2 times) 2<br>Sometimes (3–5 times) 3<br>Often (6 or more times) 4<br>Don't know 77 <i>If don't know, go to V16</i><br>Refused 88 <i>If Refused, go to V16</i> | V11      |
| The next questions ask about the most serious violent incidence you have had in the past 12 months.                                   |                                                                                                                                                                                                                |          |
| Please indicate which of the following caused your most serious injury in the last 12 months.<br>(USE SHOWCARDS)                      | Being shot with a firearm 1<br>A weapon (other than a firearm) was used by the person who injured me 2<br>Being injured without any weapon (slapped, pushed...) 3<br>Don't know 77<br>Refused 88               | V12      |
| Please indicate the relationship between yourself and the person(s) who caused your injury.                                           | Intimate partner 1<br>Parent 2<br>Child, sibling, or other relative 3<br>Friend or acquaintance 4<br>Unrelated caregiver 5<br>Stranger 6<br>Official or legal authorities 7<br>Other (specify) 8<br>Refused 88 | V13      |
|                                                                                                                                       | Other (please specify) _____                                                                                                                                                                                   | V13other |
| Since your 15th birthday, have you ever experienced a sex act involving vaginal, oral, or anal penetration <b>against your will</b> ? | Never 1<br>Once 2<br>A few times (2 to 3 times) 3<br>Many times (4 or more times) 4<br>Don't know 77<br>Refused 88                                                                                             | V16      |

### Participant Identification Number

| PHQ–9 mental health )                                                                                                                                                          | Response                                                                                             | Code |
|--------------------------------------------------------------------------------------------------------------------------------------------------------------------------------|------------------------------------------------------------------------------------------------------|------|
| <b>Over the last 2 weeks, how often have you been bothered by any of the following problems?</b><br><i>(Circle to indicate your answer)</i>                                    | Not at all (0)<br>Several days(1)<br>More than half the days (2)<br>Nearly every day(3)              |      |
| 1.Little interest or pleasure in doing things                                                                                                                                  | 0    1    2    3                                                                                     | X7a  |
| 2.Feeling down, depressed, or hopeless                                                                                                                                         | 0    1    2    3                                                                                     | X7b  |
| 3.Trouble falling or staying asleep, or sleeping too much                                                                                                                      | 0    1    2    3                                                                                     | X7c  |
| 4.Feeling tired or having little energy                                                                                                                                        | 0    1    2    3                                                                                     | X7d  |
| 5 Poor appetite or overeating                                                                                                                                                  | 0    1    2    3                                                                                     | X7e  |
| 6 Feeling bad about yourself —or that you are a failure or have let yourself or your family down                                                                               | 0    1    2    3                                                                                     | X7f  |
| 7.Trouble concentrating on things, such as reading the newspaper or watching television                                                                                        | 0    1    2    3                                                                                     | X7g  |
| 8 Moving or speaking so slowly that other people could have noticed? Or the opposite —being so fidgety or restless that you have been moving around a lot more than usual      | 0    1    2    3                                                                                     | X7h  |
| 9. Thoughts that you would be better off dead or of hurting yourself in some way                                                                                               | 0    1    2    3                                                                                     | X7i  |
| If you checked off <u>any</u> problems, how <u>difficult</u> have these problems made it for you to do your work, take care of things at home, or get along with other people? | Not difficult at all    1<br>Somewhat difficult    2<br>Very difficult    3<br>Extremely difficult 4 | X8   |

## Step 2 Physical Measurements

| <b>Blood Pressure</b>                                                                                                                             |                                             |             |
|---------------------------------------------------------------------------------------------------------------------------------------------------|---------------------------------------------|-------------|
| <b>Question</b>                                                                                                                                   | <b>Response</b>                             | <b>Code</b> |
| Interviewer ID                                                                                                                                    |                                             | M1          |
| Device ID for blood pressure                                                                                                                      |                                             | M2          |
| Cuff size used                                                                                                                                    | Small 1<br>Medium 2<br>Large 3              | M3          |
| Reading 1                                                                                                                                         | Systolic ( mmHg)                            | M4a         |
|                                                                                                                                                   | Diastolic (mmHg)                            | M4b         |
| Reading 2                                                                                                                                         | Systolic ( mmHg)                            | M5a         |
|                                                                                                                                                   | Diastolic (mmHg)                            | M5b         |
| Reading 3                                                                                                                                         | Systolic ( mmHg)                            | M6a         |
|                                                                                                                                                   | Diastolic (mmHg)                            | M6b         |
| During the past two weeks, have you been treated for raised blood pressure with drugs (medication) prescribed by a doctor or other health worker? | Yes 1<br>No 2                               | M7          |
| <b>Height and Weight</b>                                                                                                                          |                                             |             |
| <b>For women:</b> Are you pregnant?                                                                                                               | Yes 1 <i>If Yes, go to M 16 a-c</i><br>No 2 | M8          |
| Interviewer ID                                                                                                                                    |                                             | M9          |
| Device IDs for height and weight                                                                                                                  | Height                                      | M10a        |
|                                                                                                                                                   | Weight                                      | M10b        |
| Height                                                                                                                                            | in Centimetres (cm)                         | M11         |
| Weight<br><i>If too large for scale 666.6</i>                                                                                                     | in Kilograms (kg)                           | M12         |
| <b>Waist</b>                                                                                                                                      |                                             |             |
| Device ID for waist                                                                                                                               |                                             | M13         |
| Waist circumference                                                                                                                               | in Centimetres (cm)                         | M14         |

| <b>Hip Circumference and Heart Rate</b> |                     |      |
|-----------------------------------------|---------------------|------|
| Hip circumference                       | in Centimeters (cm) | M15  |
| Heart Rate                              |                     |      |
| Reading 1                               | Beats per minute    | M16a |
| Reading 2                               | Beats per minute    | M16b |
| Reading 3                               | Beats per minute    | M16c |

## Step 3 Biochemical Measurements

| <b>CORE: Blood Glucose</b>                                                                                                                       |                                                       |             |
|--------------------------------------------------------------------------------------------------------------------------------------------------|-------------------------------------------------------|-------------|
| <b>Question</b>                                                                                                                                  | <b>Response</b>                                       | <b>Code</b> |
| During the past 12 hours have you had anything to eat or drink, other than water?                                                                | Yes 1<br>No 2                                         | B1          |
| Technician ID                                                                                                                                    |                                                       | B2          |
| Device ID                                                                                                                                        |                                                       | B3          |
| Time of day blood specimen taken (24 hour clock)                                                                                                 | Hours : minutes          hrs          :          mins | B4          |
| Fasting blood glucose                                                                                                                            | mg/dl          .                                      | B5          |
| Today, have you taken insulin or other drugs (medication) that have been prescribed by a doctor or other health worker for raised blood glucose? | Yes 1<br>No 2                                         | B6          |
| <b>CORE: Blood Lipids</b>                                                                                                                        |                                                       |             |
| Total cholesterol                                                                                                                                | mg/dl          .                                      | B8          |
| During the past two weeks, have you been treated for raised cholesterol with drugs (medication) prescribed by a doctor or other health worker?   | Yes 1<br>No 2                                         | B9          |
| <b>CORE: Urinary sodium and creatinine</b>                                                                                                       |                                                       |             |
| Had you been fasting prior to the urine collection?                                                                                              | Yes 1<br>No 2                                         | B10         |
| Technician ID                                                                                                                                    |                                                       | B11         |
| Time of day urine sample taken (24 hour clock)                                                                                                   | Hours : minutes          hrs          :          mins | B13         |
| <b>EXPANDED: Triglycerides and HDL Cholesterol</b>                                                                                               |                                                       |             |
| <b>Question</b>                                                                                                                                  | <b>Response</b>                                       | <b>Code</b> |
| HDL Cholesterol                                                                                                                                  | mg/dl          .                                      | B17         |
